# Supplementary material
Source: publisher site journal article supplement (https://www.dovepress.com/article/425992)
Supplement: Supplementary file 1 [file get_supplementary_file.php]

**Supplementary Table 1:** Distribution of Aflatoxin B1 albumin (AF-alb) adduct level by sociodemographic factors among the study population, Eastern Ethiopia, 2020/21 (n=257)

|  |  | **AF-alb adduct (pg/mg of albumin)** | | | | | | | | |
| --- | --- | --- | --- | --- | --- | --- | --- | --- | --- | --- |
|  |  | **Total** | | | **Cases** | | | **Controls** | | |
| **Variables** | **Category** | **N** | **Median (IQR)** | ***p* value*** | **N** | **Median (IQR)** | ***p* value*** | **N** | **Median (IQR)** | ***p* value*** |
| Gender | Male | 162 | 8.9 (5.1-22.6) | 0.43 | 62 | 10.7 (5.9-22.6) | 0.89 | 100 | 7.7 (4.3-25.6) | 0.55 |
| Female | 95 | 7.9 (4.5-21.9) | 33 | 11.4 (4.8-30.2) | 62 | 6.7 (4.3-19.0) |
| Age category | <35 | 123 | 6.8 (4.5-18.7) | 0.18 | 48 | 9.5 (5.3-23.6) | 0.77 | 75 | 6.1 (4.3-14.8) | 0.22 |
| 35-44 | 57 | 9.9 (4.9-31.7) | 21 | 10.3 (6.1-52.0) | 36 | 9.9 (4.3-26.0) |
| 45-54 | 32 | 8.1 (5.3-17.7) | 8 | 11.0 (6.0-35.3) | 24 | 7.5 (4.1-15.7) |
| >55 | 45 | 12.5 (5.2-35.8) | 18 | 12.6 (6.4-21.0) | 27 | 12.5 (4.4-46.8) |
| Residence | Urban | 57 | 6.2 (3.9-13.1) | 0.01 | 15 | 8.3 (5.9-15.5) | 0.35 | 42 | 5.6 (3.9-12.7) | 0.03 |
| Rural | 200 | 9.5 (5.1-27.1) | 80 | 11.5 (5.5-28.2) | 120 | 7.9 (4.7-27.1) |
| Formal education | No | 176 | 9.9 (5.3-28.9) | <0.001 | 76 | 11.2 (5.8-24.8) | 0.42 | 100 | 9.2 (4.5-31.8) | 0.03 |
| Yes | 81 | 6.2 (4.2-14.0) | 19 | 8.9 (4.0-24.9) | 62 | 5.9 (4.2-12.7) |  |
| Occupation | Not farmer | 87 | 6.7 (4.3-14.7) | <0.001 | 16 | 10.1 (4.4-22.4) | 0.51 | 71 | 6.1 (4.3-12.6) | 0.05 |
| Farmer | 170 | 10.0 (5.3-29.4) | 79 | 11.2 (5.6-25.0) | 91 | 8.5 (4.4-32.0) |

**Note:** N= 257; n for cases=95; n for controls =162; **p*-value from Mann-Whitney test for variables with two categories and Kruskal-Wallis test for variables with more than two categories. AF-alb, aflatoxin B1 albumin adducts

.
